# The networks of m<sup>6</sup>A-SARS-CoV-2 related genes and immune infiltration patterns in idiopathic pulmonary fibrosis

Xinyu Li<sup>1,2</sup>, Cheng Peng<sup>3</sup>, Ziqing Zhu<sup>2</sup>, Haozheng Cai<sup>1</sup>, Quan Zhuang<sup>1,4</sup>

<sup>1</sup>Transplantation Center, The 3rd Xiangya Hospital, Central South University, Changsha 410013, Hunan, China

<sup>2</sup>Xiangya School of Medicine, Central South University, Changsha 410013, Hunan, China

<sup>3</sup>Department of Plastic Surgery, The 3rd Xiangya Hospital, Central South University, Changsha 410013, Hunan, China

<sup>4</sup>Research Center of National Health Ministry on Transplantation Medicine, Changsha 410013, Hunan, China

**Correspondence to:** Quan Zhuang; **email:** [zhuangquansteven@csu.edu.cn](mailto:zhuangquansteven@csu.edu.cn)

**Keywords:** idiopathic pulmonary fibrosis, SARS-CoV-2, N<sup>6</sup>-methyladenosine, immune, prognosis, COVID-19

**Received:** November 18, 2020

**Accepted:** February 16, 2021

**Published:** March 1, 2021

**Copyright:** © 2021 Li et al. This is an open access article distributed under the terms of the [Creative Commons Attribution License](https://creativecommons.org/licenses/by/3.0/) (CC BY 3.0), which permits unrestricted use, distribution, and reproduction in any medium, provided the original author and source are credited.

## ABSTRACT

Idiopathic pulmonary fibrosis (IPF) is a chronic progressive lung disease with a poor prognosis. The current coronavirus disease 2019 (COVID-19) shares some similarities with IPF. SARS-CoV-2 related genes have been reported to be broadly regulated by N<sup>6</sup>-methyladenosine (m<sup>6</sup>A) RNA modification. Here, we identified the association between m<sup>6</sup>A methylation regulators, COVID-19 infection pathways, and immune responses in IPF. The characteristic gene expression networks and immune infiltration patterns of m<sup>6</sup>A-SARS-CoV-2 related genes in different tissues of IPF were revealed. We subsequently evaluated the influence of these related gene expression patterns and immune infiltration patterns on the prognosis/lung function of IPF patients. The IPF cohort was obtained from the Gene Expression Omnibus dataset. Pearson correlation analysis was performed to identify the correlations among genes or cells. The CIBERSORT algorithm was used to assess the infiltration of 22 types of immune cells. The least absolute shrinkage and selection operator (LASSO) and proportional hazards model (Cox model) were used to develop the prognosis prediction model. Our research is pivotal for further understanding of the cellular and genetic links between IPF and SARS-CoV-2 infection in the context of the COVID-19 pandemic, which may contribute to providing new ideas for prognosis assessment and treatment of both diseases.

## INTRODUCTION

Idiopathic pulmonary fibrosis (IPF) is a chronic lung disease characterized by progressive pulmonary interstitial fibrosis and lung dysfunction. IPF patients usually show a poor prognosis with an average survival time of 3–5 years [1], and the specific etiology and pathogenesis of IPF remain unclear.

N<sup>6</sup>-methyladenosine (m<sup>6</sup>A) is the most abundant mRNA modification in mammalian cells. There are three types of proteins that regulate m<sup>6</sup>A: 1) “writers,” including methyltransferase-like 3 (METTL3), METTL14, Wilms tumor 1-associated protein, and KIAA1429; 2) “erasers,” including fat mass and obesity-associated protein and

alkB homologue 5; and 3) “readers,” including members of the YT521-B homology domain-containing protein and the heterogeneous nuclear ribonucleoprotein families [2]. Recent studies have suggested that m<sup>6</sup>A is involved in the regulation of numerous physiological processes, including cell differentiation, tumorigenesis, and viral immunity [3–5]. In addition, studies have shown that it could serve as a potential prognostic predictor for cancer patients [6, 7]. Another study also demonstrated that m<sup>6</sup>A modification of pri-miRNA-126 could activate the PI3K/AKT/mTOR pathway, contributing to pulmonary fibrosis in mice [8].

Since late 2019, a novel highly transmissible coronavirus, which was later defined as severe acute

respiratory syndrome coronavirus 2 (SARS-CoV-2), has emerged, causing a global pandemic of acute respiratory disease, named “coronavirus disease 2019” (COVID-19). To date, no effective treatment has been available. Recently, researchers identified 332 high-confidence SARS-CoV-2-human protein–protein interactions, revealing targets for drug repurposing [9]. Because COVID-19 is an acute pulmonary infection with a certain potential correlation with IPF, the association between COVID-19 and IPF at the cellular and genetic levels is worth exploring.

In this study, we innovatively explored the association between m<sup>6</sup>A methylation regulators, COVID-19 infection pathways, and immune responses. The characteristic gene expression networks and immune infiltration patterns of m<sup>6</sup>A-SARS-CoV-2 related genes in different tissues of IPF were revealed. Moreover, we evaluated the influence of these related gene expression and immune infiltration patterns on the prognosis/lung function of the IPF patients. During the COVID-19 pandemic, these results would help to further understand the link between IPF and SARS-CoV-2 infection and provide new insights for prognosis assessment and treatment of both diseases.

## RESULTS

### The networks of m<sup>6</sup>A-SARS-CoV-2 related genes and immune infiltration patterns in bronchoalveolar lavage (BAL) cells of the IPF

#### *The gene expression patterns related to m<sup>6</sup>A and SARS-CoV-2 in IPF*

The discovery cohort included 176 IPF patients from the GEO database (GSE70867). The batch effect was eliminated using the sva package (Figure 1A, 1B). We extracted the expression matrices of 19 m<sup>6</sup>A-related genes and 305 SARS-CoV-2 related genes from the GEO datasets. A total of 110 SARS-CoV-2 related genes were found to be significantly correlated with m<sup>6</sup>A-related genes, which were defined as m<sup>6</sup>A-related-CoV genes. Combined with the survival information, univariate Cox regression was then applied to screen prognostic genes, and 9 m<sup>6</sup>A-related-CoV genes ( $p < 0.01$ ) were retained (Figure 1C). Then, we performed a LASSO regression, and eight optimal variables were obtained from the above 9 m<sup>6</sup>A-related-CoV genes. The correlations between the m<sup>6</sup>A-related genes and the 8 m<sup>6</sup>A-related-CoV genes are shown in Figure 1D.

Additionally, we used the expression levels of 8 m<sup>6</sup>A-related-CoV genes and the corresponding coefficients derived from the multivariate Cox regression model to estimate the risk score for each patient: Score 1 =  $0.3869 \times \text{expression of BRD4} + 0.6027 \times \text{expression of}$

$\text{ATP13A3} + 0.3401 \times \text{expression of MARK3} + 0.3019 \times \text{expression of ACAD9} - 0.8837 \times \text{expression of REEP5} - 0.3489 \times \text{expression of REEP6} - 0.4576 \times \text{expression of PPIL3} - 0.2066 \times \text{expression of POR}$ . Based on the Score 1 of each patient, we divided the patients into two groups using the maximally selected rank method: high-risk group and low-risk group (Figure 1E, 1F).

Due to the different prognostic outcomes, we sought to investigate the possible differences between the high-risk and low-risk groups using the gene set enrichment analysis (GSEA). The results suggested that high-risk patients had high levels of response to oxygen-containing compound signaling pathway, reactive oxygen species (ROS) metabolic process signaling pathway, and response to ROS signaling pathway (Figure 1G). In gene ontology (GO) functional annotation, biological process analysis suggested that overexpressed genes in the high-risk group were significantly enriched in the regulation of inflammatory response, cell adhesion, immune response, cell–cell signaling, and extracellular matrix organization. For cellular component analysis, these genes were significantly enriched in the integral components of the membrane, plasma membrane, and extracellular exosome. Molecular function analysis revealed that these proteins were significantly enriched in protein binding and receptor binding (Figure 1H).

#### *The m<sup>6</sup>A-CoV related lncRNAs in IPF*

To further explore the gene regulatory network, we identified eight lncRNAs that were significantly correlated with both SARS-CoV-2 related genes and m<sup>6</sup>A related genes, which were defined as m<sup>6</sup>A-CoV related lncRNAs. Figure 2A, 2B shows the correlations between the lncRNAs and SARS-CoV-2/m<sup>6</sup>A related genes, respectively (SARS-CoV-2/m<sup>6</sup>A related genes that are not significantly related are not shown in the figure). After univariate Cox and LASSO screening, 2 m<sup>6</sup>A-CoV related lncRNAs were screened for a multivariate Cox regression model to estimate the risk score: Score 2 =  $-0.3251 \times \text{expression of MGC4859} - 0.1319 \times \text{expression of HYMA1}$ . The IPF patients were also divided into high-risk and low-risk groups based on Score 2 (Figure 2C, 2D).

#### *The SARS-CoV-2 related immune infiltration patterns in IPF*

The ESTIMATE algorithm was used to obtain stromal and immune scores. The LASSO-Cox analysis demonstrated that the stromal and immune scores were positively correlated with the risk of poor prognosis, suggesting that high immune infiltration might be a risk factor for prognosis.

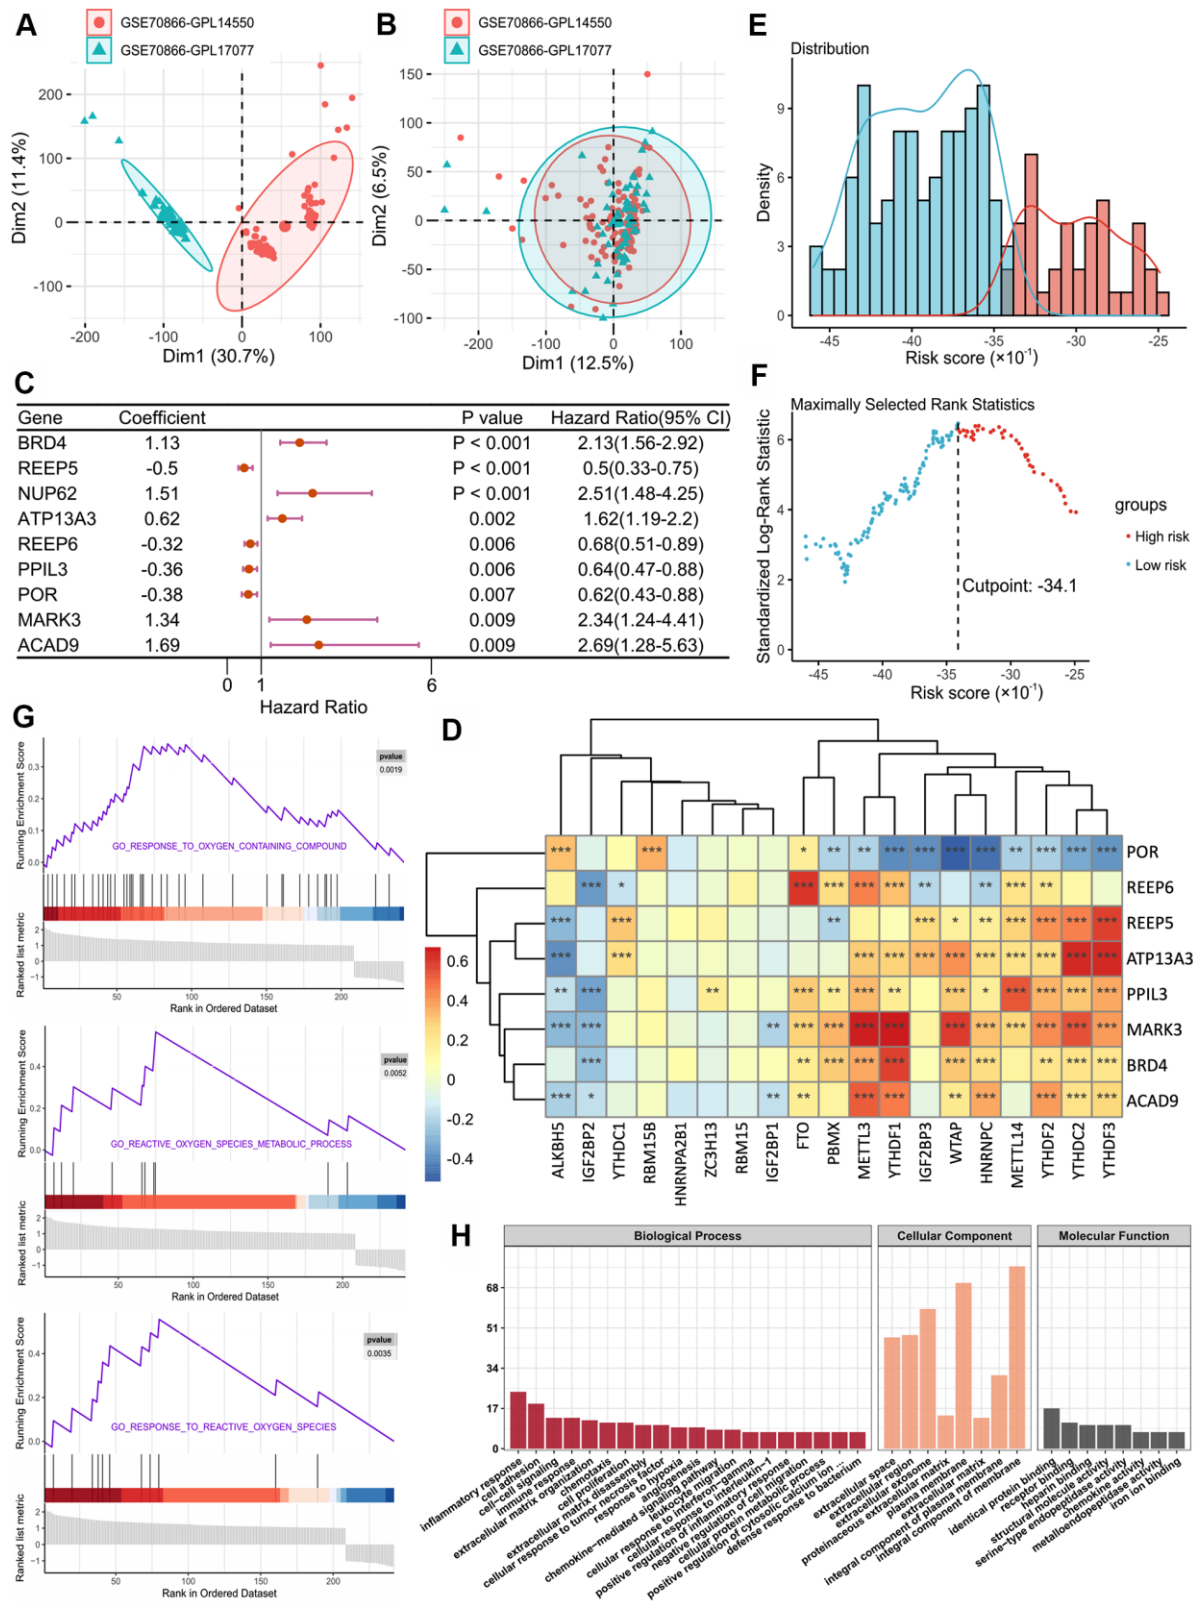

**Figure 1.** (A, B) Eliminating the batch effect between different sequencing platforms. (A) is the principal component analysis (PCA) plot before elimination of the batch effect, and (B) is the PCA plot after elimination. (C) Forest plot of 9 DEGs with P < 0.01 by univariate Cox regression. (D) The correlations between the m<sup>6</sup>A-related genes and 8 m<sup>6</sup>A-related-CoV genes. (E) Histogram based on maximally selected rank grouping. (F) The cut-off point with the maximum standard log-rank statistic was marked with a vertical dashed line. (G) The plots of GSEA results. (H) GO enrichment analysis of risk DEGs.

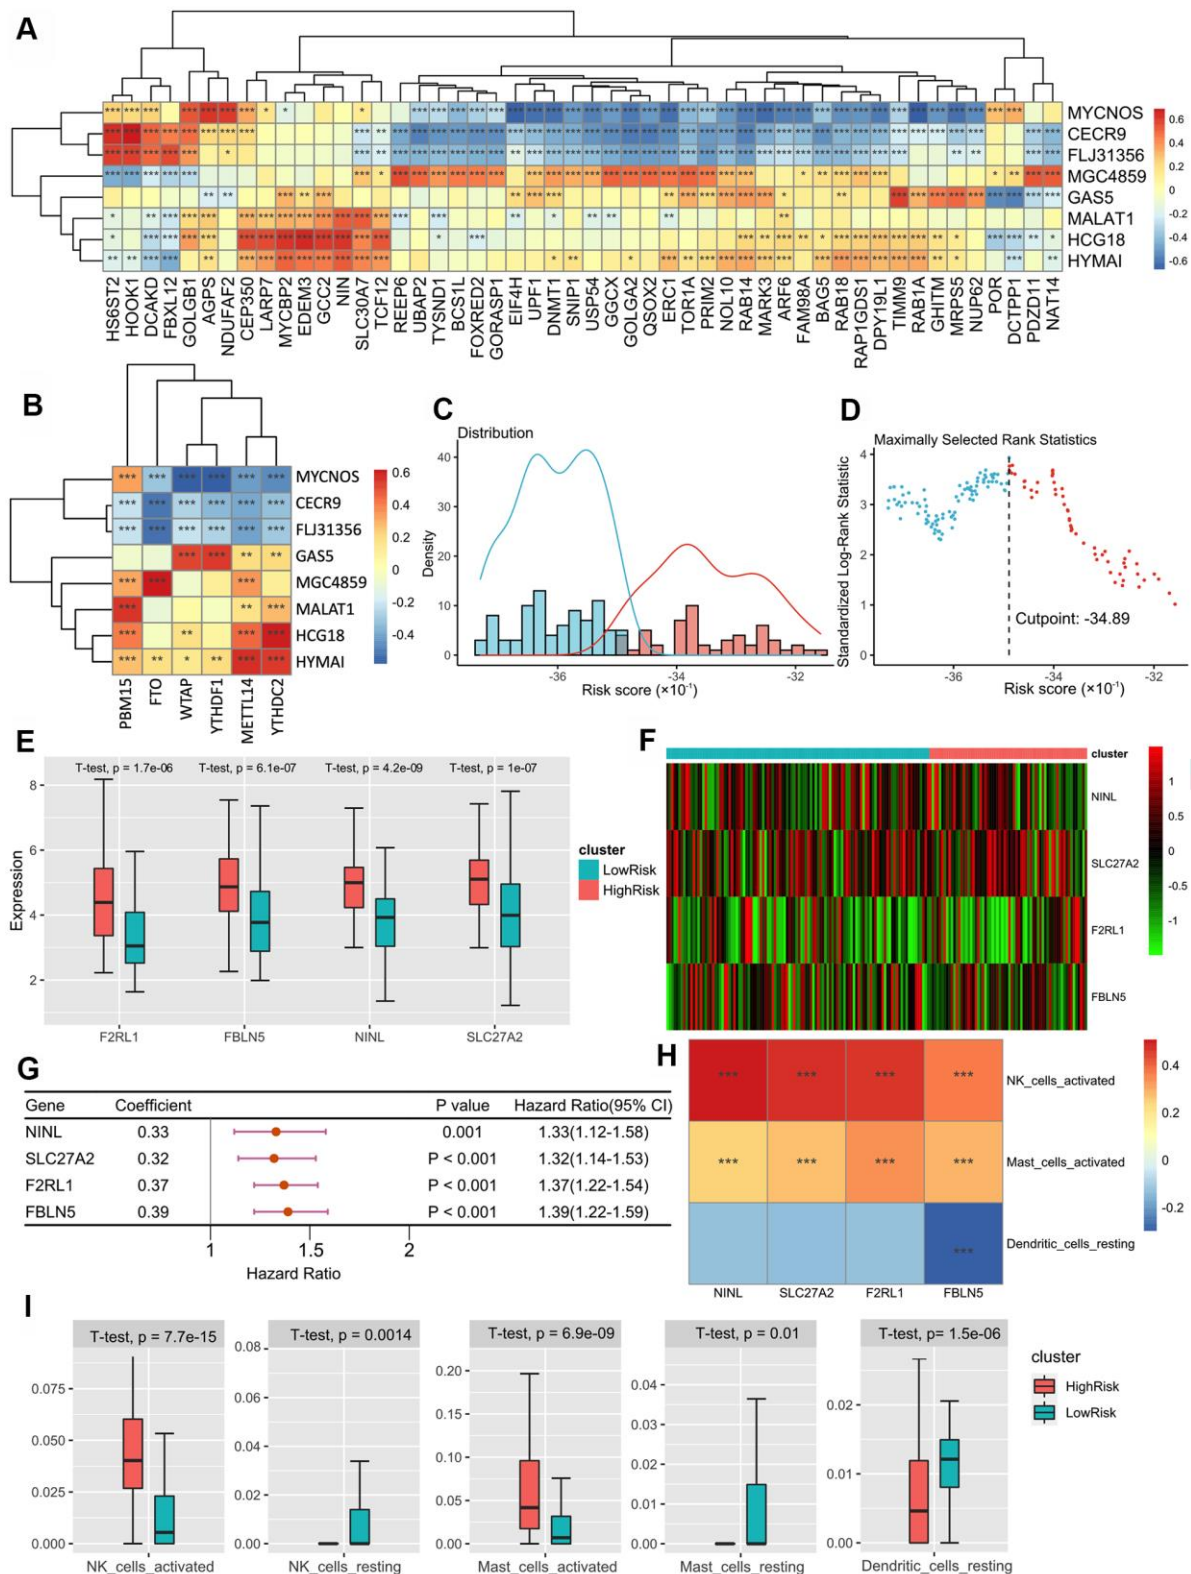

**Figure 2.** (A) The heatmap of the correlations between the lncRNAs and SARS-CoV-2 related genes. (B) The heatmap of correlations between the lncRNAs and m<sup>6</sup>A related genes. (C) Histogram based on maximally selected rank grouping. (D) The cut-off point with the maximum standard log-rank statistic was marked with a vertical dashed line. (E) The box plot showed the difference of F2RL1, FBLN5, NINL and SLC27C between low-risk group and high-risk groups. (F) The expression profiles of DEGs between low-risk group and high-risk groups. (G) Forest plot of 9 DEGs with P < 0.01 by univariate Cox regression. (H) The heatmap of the correlations between three DEGs and 4 immune cells. (I) The box plot showed the significant difference of the immune cell infiltration between two groups.

To further identify the immune infiltration patterns in IPF, the composition of 22 immune cells was assessed using CIBERSORT. Univariate Cox analysis showed that activated natural killer (NK) cells, activated mast cells, and resting dendritic cells (DCs) were significantly correlated with the survival of IPF patients ( $p < 0.01$ ). LASSO-Cox analysis showed that activated NK cells and activated mast cells were positively correlated with the risk of poor prognosis. In addition, resting DCs negatively correlated with the risk score. Based on the risk score calculated by these three types of immune cells, we divided the patients into two groups, and four differentially expressed SARS-CoV2-related genes were identified as DEGs (Figure 2E, 2F). Univariate Cox regression demonstrated that four DGEs had significant associations with survival prognosis ( $p < 0.01$ ) (Figure 2G). The correlations between the four DGEs and three immune cells are shown in Figure 2H, which suggests a co-expression pattern of SARS-CoV2-related genes and immune cell infiltration.

Furthermore, we included 3 immune cells and 4 DGEs in the multivariate Cox regression model to estimate the risk score: Score 3 =  $5.57 \times$  composition of activated NK cells +  $2.33 \times$  composition of activated mast cells -  $19.4 \times$  composition of resting DCs -  $0.0269 \times$  expression of NINL +  $0.0497 \times$  expression of SLC27A2 +  $0.156 \times$  expression of F2RL1 +  $0.22 \times$  expression of FBLN5. We also identified differences in the activation/resting state of NK cells, mast cells, and DCs in the two groups, which showed that the activation ratio of the three immune cells was higher in the high-risk group, while the resting ratio was higher in the low-risk group (Figure 2I).

#### ***The combined model based on Score 1–3 and survival prognosis verification***

Based on the risk models of m<sup>6</sup>A-related-CoV genes (Score 1), m<sup>6</sup>A-CoV related lncRNAs (Score 2), and SARS-CoV-2 related immune infiltration patterns (Score 3), multivariate Cox regression was used to establish the combined model: Score-combined =  $0.7902 \times$  Score 1 +  $0.576 \times$  Score 2 +  $0.4434 \times$  Score 3.

Finally, we performed a prognostic validation using three independent models and a combined model. The results demonstrated that the group survival verifications of the three independent models and the combined model were significant (Figure 3A–3F). The receiver operating characteristic (ROC) curve showed that the area under the curve (AUC) values of the combined model within 1–5 years were all greater than 0.75 in the discovery cohort, which were also greater than the AUC of the independent models (Figure 3G–3J). This suggests that the combined model has a better predictive value for the prognosis of the IPF patients.

We further developed a nomogram for 1–5 years of overall survival prediction based on the combined Cox model (Figure 3K).

#### **The networks of m<sup>6</sup>A-SARS-CoV-2 related genes and immune infiltration patterns in the whole blood of IPF**

We further verified the above prediction method in external data sets (GSE93606), which included the peripheral whole blood from 57 patients with IPF. Similarly, we screened nine m<sup>6</sup>A-related-CoV genes (Figure 4A). Multivariate Cox regression model to estimate the risk score was used as follows: Score 1 =  $0.8919 \times$  expression of ZC3H7A -  $0.1496 \times$  expression of YIF1A -  $1.4191 \times$  expression of BAG5 +  $3.9659 \times$  expression of RHOA +  $2.3642 \times$  expression of NUP214 +  $0.4134 \times$  expression of INTS4 +  $0.7913 \times$  expression of GLA +  $1.4476 \times$  expression of AAR2 +  $1.4582 \times$  expression of ATP1B1.

Univariate Cox regression showed that  $\gamma\delta$ T cells and M2 macrophages were significantly correlated with the survival of patients with IPF ( $p < 0.01$ ). LASSO-Cox analysis showed that  $\gamma\delta$ T cells and M2 macrophages were positively correlated with the risk of poor prognosis. We included two immune cells in the multivariate Cox regression model to estimate the risk score: Score 2 =  $14.4 \times$  composition of  $\gamma\delta$ T cells +  $24.7 \times$  composition of M2 macrophages. Based on Score 2, we divided the patients into two groups, and three differentially expressed SARS-CoV2-related DEGs were obtained (Figure 4B). The co-expression patterns of SARS-CoV2-related genes and immune cell infiltration are shown in Figure 4C.

Based on the risk models of m<sup>6</sup>A-related-CoV genes (Score 1), the SARS-CoV-2 related immune infiltration patterns (Score 2), and the multivariate Cox regression model was used to establish the combined model: Score-combined =  $1.0217 \times$  Score 1 +  $1.0217 \times$  Score 2. Prognostic validations of the two independent models and the combined model were performed. The results demonstrated that the group survival verifications of the two models and the combined model were significant (Figure 4D–4F). The AUC of the combined model within 1–3 years was greater than that of the two independent models (Figure 4H, 4I).

#### **The networks of m<sup>6</sup>A-SARS-CoV-2 related genes and immune infiltration patterns in peripheral blood mononuclear cells (PBMC) of the IPF**

We verified the above prediction method in the external dataset “GSE28221,” which included 120 IPF patients’ peripheral blood mononuclear cells. Similarly, we

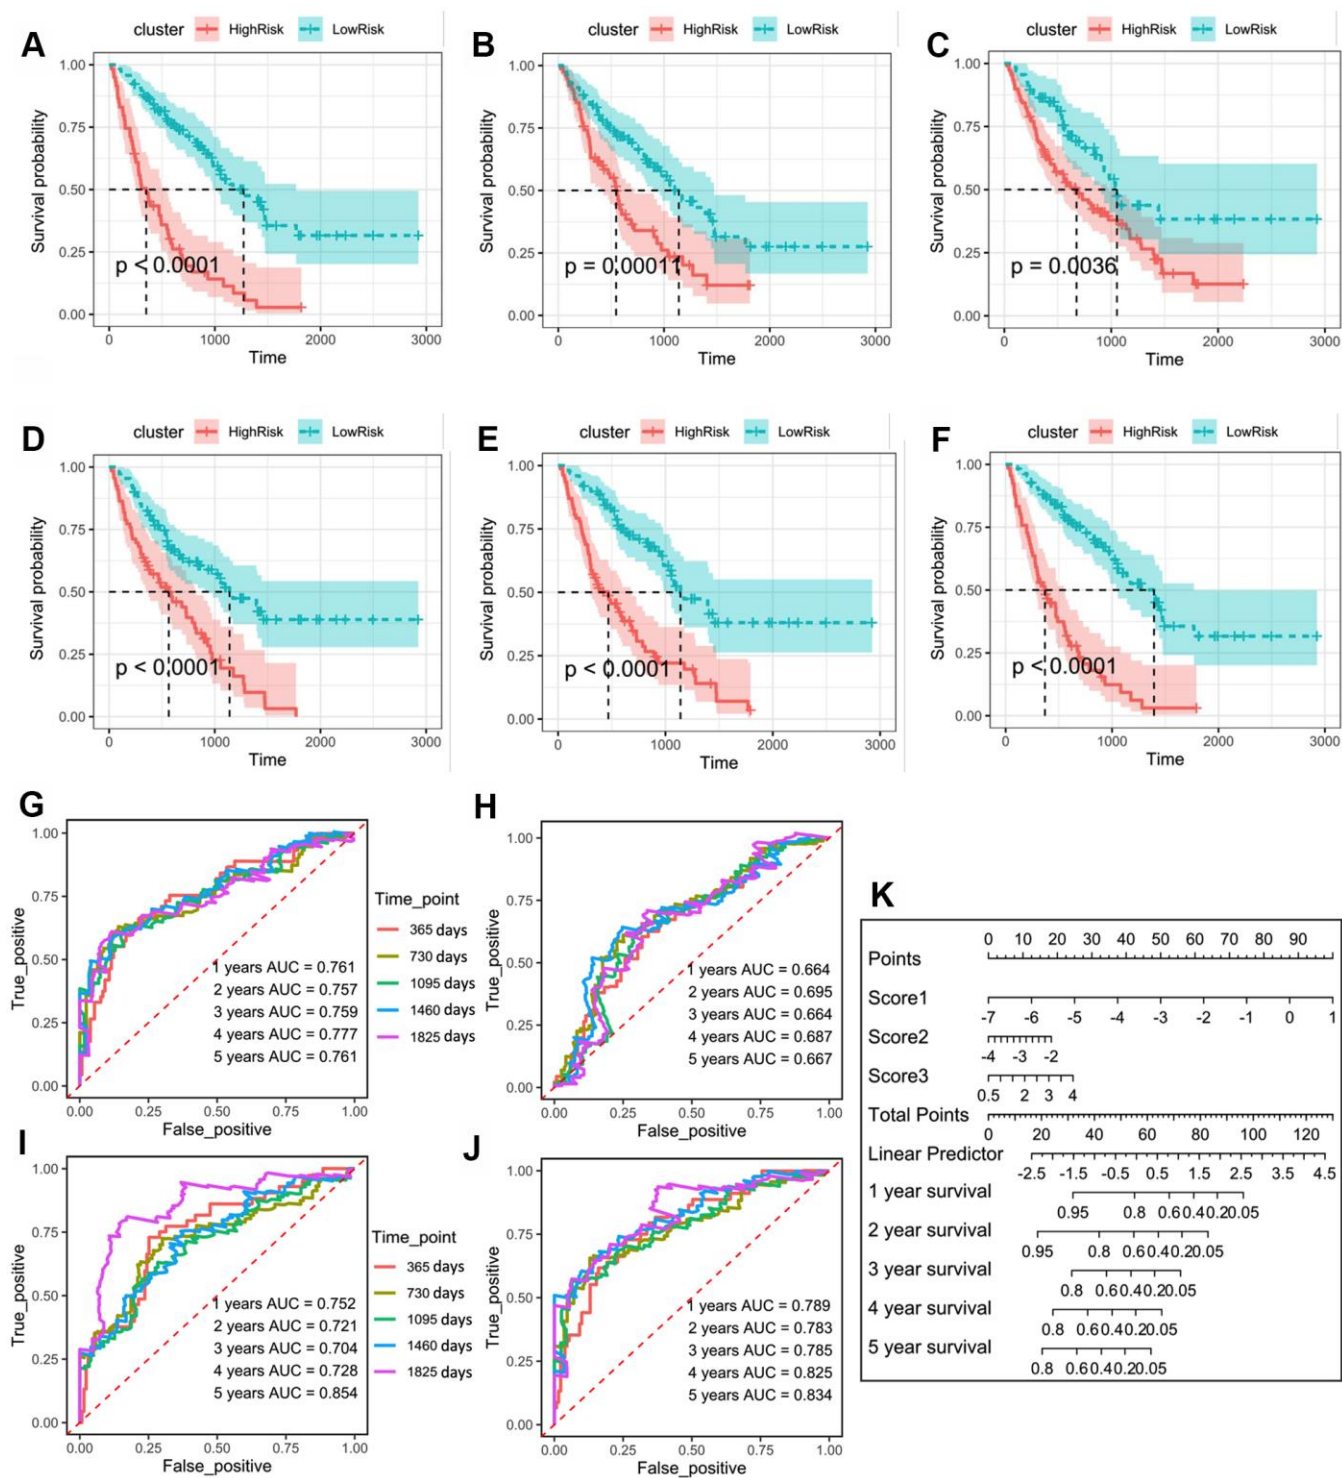

**Figure 3.** (A) Kaplan–Meier plot of overall survival in two clusters based on the risk models of m<sup>6</sup>A-related-CoV genes (Score 1). (B) Kaplan–Meier plot of overall survival in two clusters based on the risk models of m<sup>6</sup>A-CoV related lncRNAs (Score 2). (C) Kaplan–Meier plot of overall survival in two clusters based on the risk models of ESTIMATE immune score. (D) Kaplan–Meier plot of overall survival in two clusters based on the risk models of 3 immune cells’ infiltration. (E) Kaplan–Meier plot of overall survival in two clusters based on the risk models of SARS-CoV-2 related immune infiltration patterns (Score 3). (F) Kaplan–Meier plot of overall survival in two clusters based on the risk models of the combined Cox regression model. (G) The ROC curve in the risk models of m<sup>6</sup>A-related-CoV genes (Score 1). (H) The ROC curve in the risk models of m<sup>6</sup>A-CoV related lncRNAs (Score 2). (I) The ROC curve in the risk models of SARS-CoV-2 related immune infiltration patterns (Score 3). (J) The ROC curve in the risk models of the combined Cox regression model. (K) The nomogram for the 1–5-year overall survival based on the combined Cox regression model.

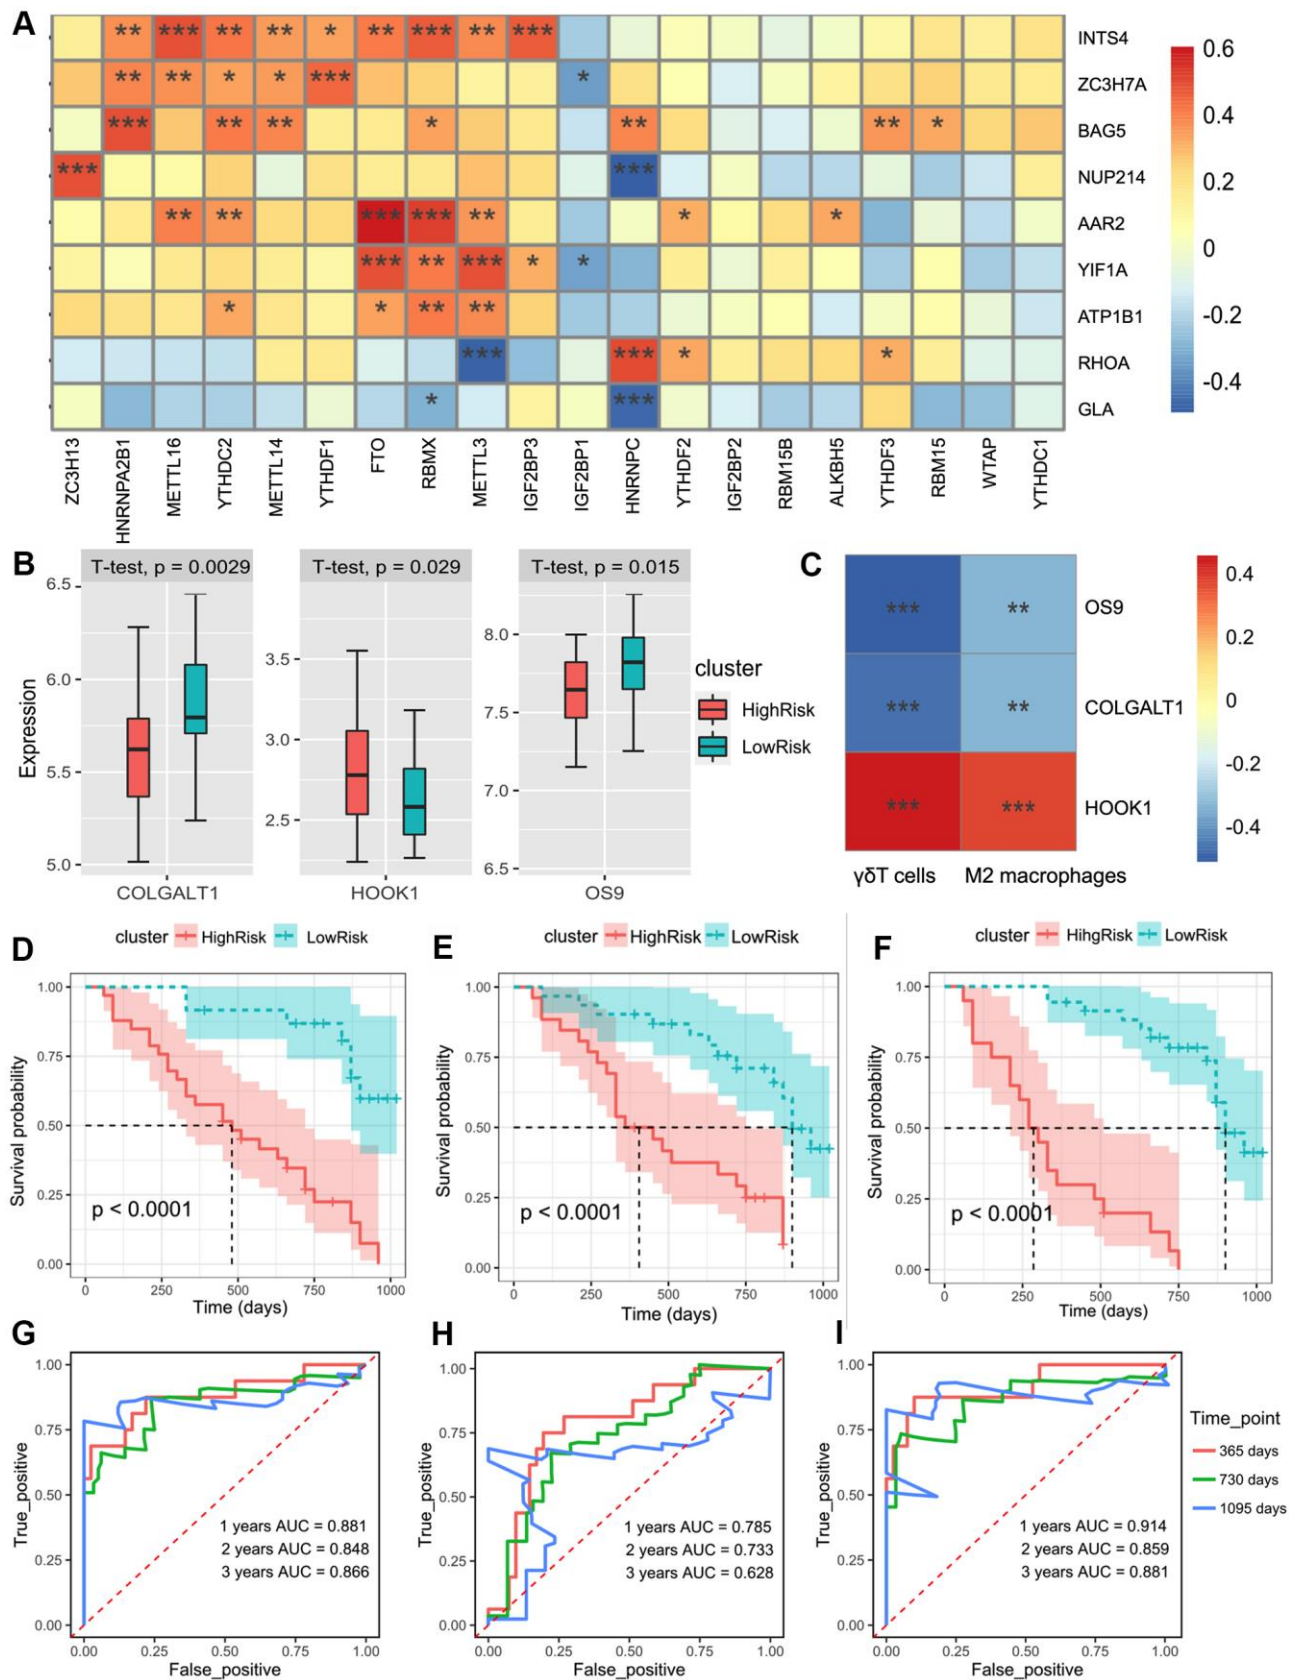

**Figure 4.** (A) The heatmap of the correlations between the m<sup>6</sup>A-related genes and 9 m<sup>6</sup>A-related-CoV genes in the whole blood of IPF. (B) Patients were divided into the low-risk group and high-risk group according to the infiltration of  $\gamma$ T cells and M2 macrophages. The box plot

showed the difference of the COLGALT1, HOOK1, and OS9 between low-risk and high-risk groups. (C) The heatmap of the correlations between the 2 immune cell composition and 3 SARS-CoV-2 related DEGs. (D) Kaplan–Meier plot of overall survival in two clusters based on the risk models of m<sup>6</sup>A-related-CoV genes (Score 1). (E) Kaplan–Meier plot of overall survival in two clusters based on the risk models of the immune infiltration patterns (Score 2). (F) Kaplan–Meier plot of the overall survival in two clusters based on the risk models of the combined Cox regression model. (G) The ROC curve in the risk models of m<sup>6</sup>A-related-CoV genes (Score 1). (H) The ROC curve in the risk models of the immune infiltration patterns (Score 2). (I) The ROC curve in the risk models of the combined Cox regression model.

screened seven m<sup>6</sup>A-related-CoV genes (Figure 5A). Meanwhile, there were 5 m<sup>6</sup>A-CoV related lncRNAs extract from the datasets. The alluvial diagram showed a correlation between m<sup>6</sup>A-CoV related lncRNAs and m<sup>6</sup>A related genes and SARS-CoV-2 related genes (Figure 5B). LASSO-Cox analysis suggested that the composition of naïve CD4<sup>+</sup> T cells was significantly correlated with the survival of the IPF patients, which could be seen as a protective factor ( $p < 0.01$ ). HOOK1 expression correlated with the infiltration of naïve CD4<sup>+</sup> T cells, showing a co-expression pattern. Therefore, the expression of HOOK1 and infiltration of naïve CD4<sup>+</sup> T cells were combined to build a model. After the multivariate Cox regression analysis, Figure 5C, 5D plots the discrepancy between HOOK1 expression and naïve CD4<sup>+</sup> T cell infiltration in the high-risk and low-risk groups.

Therefore, based on the risk models of m<sup>6</sup>A-related-CoV genes (Score 1), m<sup>6</sup>A-CoV related lncRNAs (Score 2), and SARS-CoV-2 related immune infiltration patterns (Score 3), a multivariate Cox regression model was used to establish the combined model: Score-combined =  $0.73795 \times \text{Score 1} + 0.09324 \times \text{Score 2} + 0.09324 \times \text{Score 3}$ . The group survivorship curve and ROC curve of the three models and the combined model are shown in Figure 5E–5L. The group survival verifications of these three independent models and the combined model were remarkable. The AUC of the combined model within 1–3 years was greater than that of the three independent models.

### Validation of the prognostic prediction of pulmonary function in IPF

Lastly, we verified the correlation between our prediction method and pulmonary function in patients with IPF. We screened five m<sup>6</sup>A-CoV related genes that were significantly related to forced vital capacity (FVC) and carbon monoxide diffusing capacity (DLCO). The correlations between the 5 m<sup>6</sup>A-CoV related genes and FVC/DLCO are plotted in Figure 6A. LARP7 and CHPF levels were significantly correlated with DLCO. LARP7 was identified as a protective gene, and CHPF was considered a dangerous gene. GRPEL1, DNAJC11, and SEPSECS were significantly correlated with FVC, which were both identified as protective genes. Based on the expression of LARP7 and CHPF, patients were divided into high and low DLCO clusters. Meanwhile, based on the expression of GRPEL1, DNAJC11, and

SEPSECS, patients were divided into high FVC and low FVC groups. The discrepancies in DLCO and FVC in different clusters are plotted in Figure 6B, 6D, and the different expressions of the above-described genes in different groups are shown in Figure 6C, 6E. In addition, Table 1 summarizes the networks of m<sup>6</sup>A-SARS-CoV-2 related genes and the immune infiltration patterns of patients with IPF.

## DISCUSSION

There is some overlap in the progress between COVID-19 and pulmonary fibrosis [10–12]. In addition, IPF is a risk factor for COVID-19 as IPF patients have a higher expression of some SARS-CoV-2 related genes, which may play a crucial role in SARS-CoV-2 entry, processing, and attachment [13, 14]. Considering the connections between these two diseases, researchers have identified common differentially expressed genes, pathogenic pathways, and candidate drug targets for IPF and COVID-19 [14]. Here, we identified the association between m<sup>6</sup>A methylation regulators, COVID-19 infection pathways, and immune responses in IPF.

Our results suggest that some SARS-CoV-2 related genes in IPF are broadly regulated by m<sup>6</sup>A. Increasing evidence has shown a relationship between m<sup>6</sup>A RNA modification and antiviral responses [15–17]. Among the eight m<sup>6</sup>A-SARS-CoV-2 related genes in BAL cells, BRD4 appears to be the most promising drug target for pulmonary fibrosis [18]. Emerging evidence has revealed the role of BRD4 in fibrosis and airway remodeling. It was found that BRD4 was involved in pulmonary fibrosis by downregulating signals after growth factor stimulation [19], driving TGF- $\beta$ -induced NOX4 expression in human lung fibroblasts [20], and mediating NF-kappaB-dependent epithelial-mesenchymal transition of airway epithelium [21]. In COVID-19, BRD4, ubiquitous hubs commonly found in multiple tissues, is also expected to be drug targets for rescuing multiple organ injuries and dealing with inflammation [22]. As another risk gene, RHOA encodes a member of the Rho family of small GTPases, which cycles between inactive GDP-bound and active GTP-bound states and functions as a molecular switch in signal transduction cascades [23]. RHOA signaling can regulate cyclin D1 expression and activate proliferation in IPF lung fibroblasts [24]. In summary, patients with high expression levels of these risk genes should be considered. For IPF patients, more attention



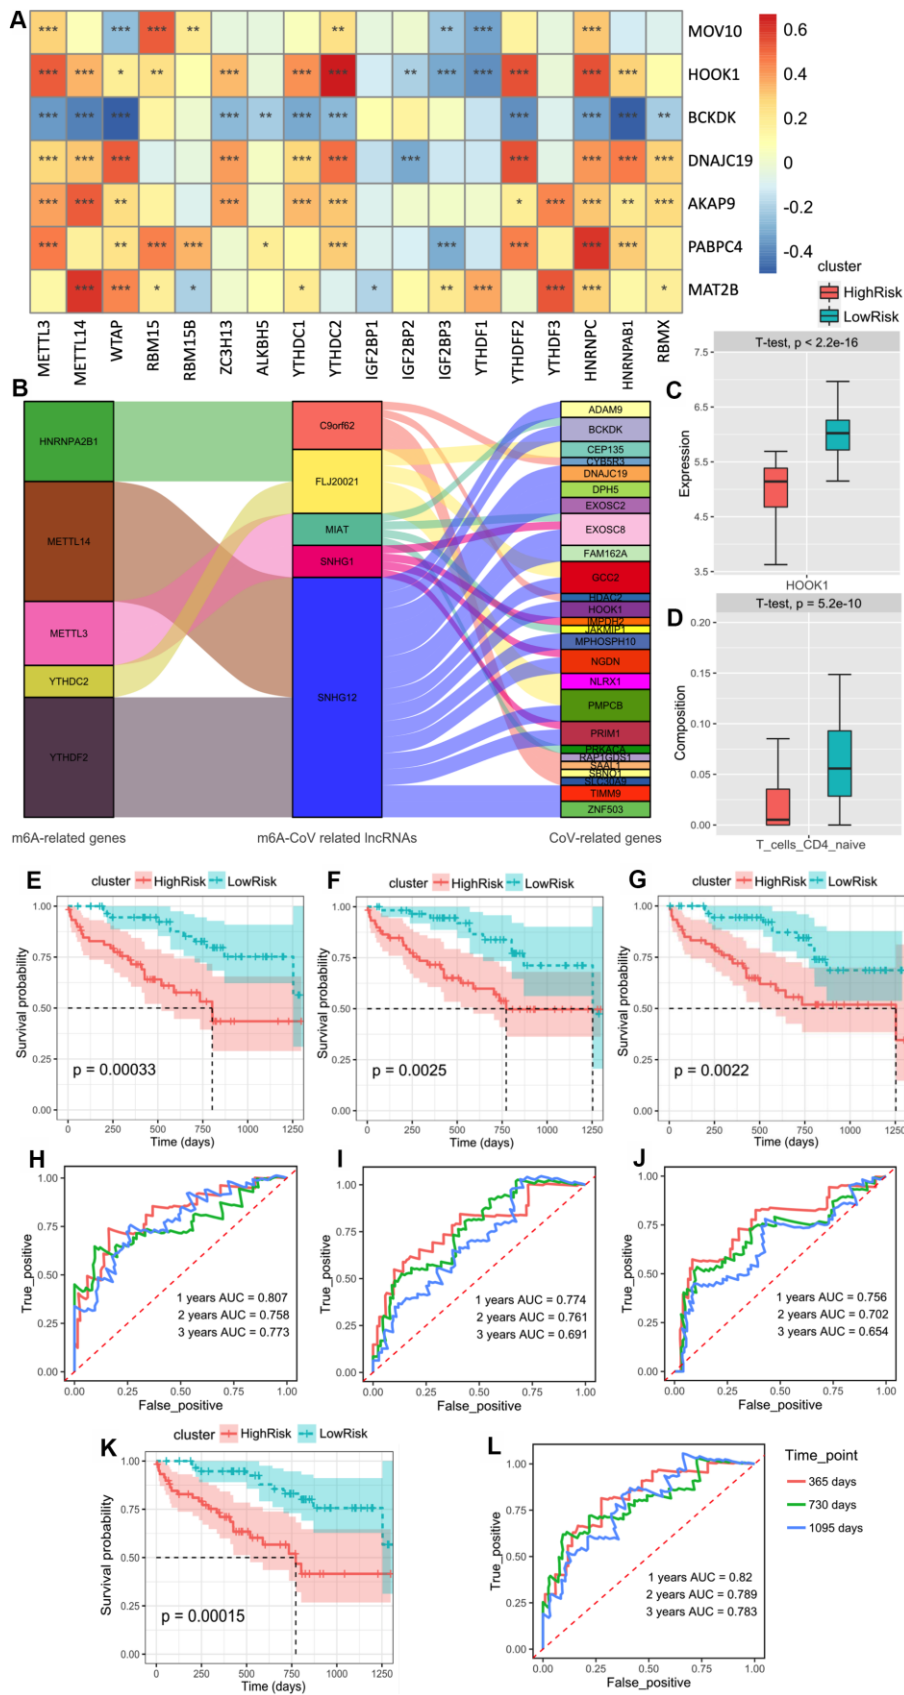

**Figure 5.** (A) The heatmap of the correlations between the m<sup>6</sup>A-related genes and 9 m<sup>6</sup>A-related-CoV genes in the peripheral blood mononuclear cell of IPF. (B) The alluvial diagram of the correlation between m<sup>6</sup>A-CoV related lncRNAs, m<sup>6</sup>A related genes, and SARS-COV-2

related genes. (C) The box plot of the discrepancy of the HOOK1 expression in two clusters based on the risk models of SARS-CoV-2 related immune infiltration patterns (Score 3). (D) The box plot of the discrepancy of the infiltration of the naïve CD4<sup>+</sup>T cells in two clusters based on the risk models of SARS-CoV-2 related immune infiltration patterns (Score 3). (E) Kaplan–Meier plot of the overall survival in two clusters based on the risk models of m<sup>6</sup>A-related-CoV genes (Score 1). (F) Kaplan–Meier plot of the overall survival in two clusters based on the risk models of m<sup>6</sup>A-CoV related lncRNAs (Score 2). (G). Kaplan–Meier plot of the overall survival in two clusters based on the risk models of SARS-CoV-2 related immune infiltration patterns (Score 3). (H) The ROC curve in the risk models of m<sup>6</sup>A-related-CoV genes (Score 1). (I) The ROC curve in the risk models of m<sup>6</sup>A-CoV related lncRNAs (Score 2). (J) The ROC curve in the risk models of SARS-CoV-2 related immune infiltration patterns (Score 3). (K) Kaplan–Meier plot of the overall survival in two clusters based on the risk models of the combined Cox regression model. (L) The ROC curve in the risk models of the combined Cox regression model.

should be paid to prevent viral infection. For COVID-19 patients, the possible development of fibrosis should be prevented in advance.

In addition, the role of immune cells in the pathogenesis of IPF has attracted increasing attention. Our study found six types of immune cells and their co-expression patterns with SARS-CoV-2 related genes that significantly affected the prognosis of IPF. High infiltration of activated NK cells, activated mast cells,  $\gamma\delta$ T cells, and M2 macrophages were risk factors, while naïve CD4<sup>+</sup>T cells and resting DCs were protective factors. This suggests that the high activation state of immune cells in IPF is detrimental to patient prognosis.

NK cells play a role in blocking fibrotic liver diseases [25]; however, their role in the lung is still under debate

[26]. Our study showed that activated NK cells had high infiltration in the high-risk group, which might be associated with infection and inflammation in patients. Compared with other pulmonary fibrosis diseases, more mast cells and a high level of TGF- $\beta$  were found in patients with IPF [27]. Mast cells not only secrete TGF- $\beta$ , a profibrotic mediator that contributes to fibroblast proliferation, but also enhances their response [28]. Moreover, mast cells and fibroblasts are closely related and may promote the development of pulmonary fibrosis through synergistic action [29–31]. Our study also suggests that activated CD4<sup>+</sup> T cells may be a risk factor. T-helper (Th) 1 secretes IFN- $\gamma$  to reduce pulmonary fibrosis, whereas Th2 cytokines IL-4, IL-5, and IL-13 stimulate fibroblast proliferation, collagen production, and fibroblast activation [32]. Th17 has a pro-fibrotic effect by promoting fibroblast proliferation

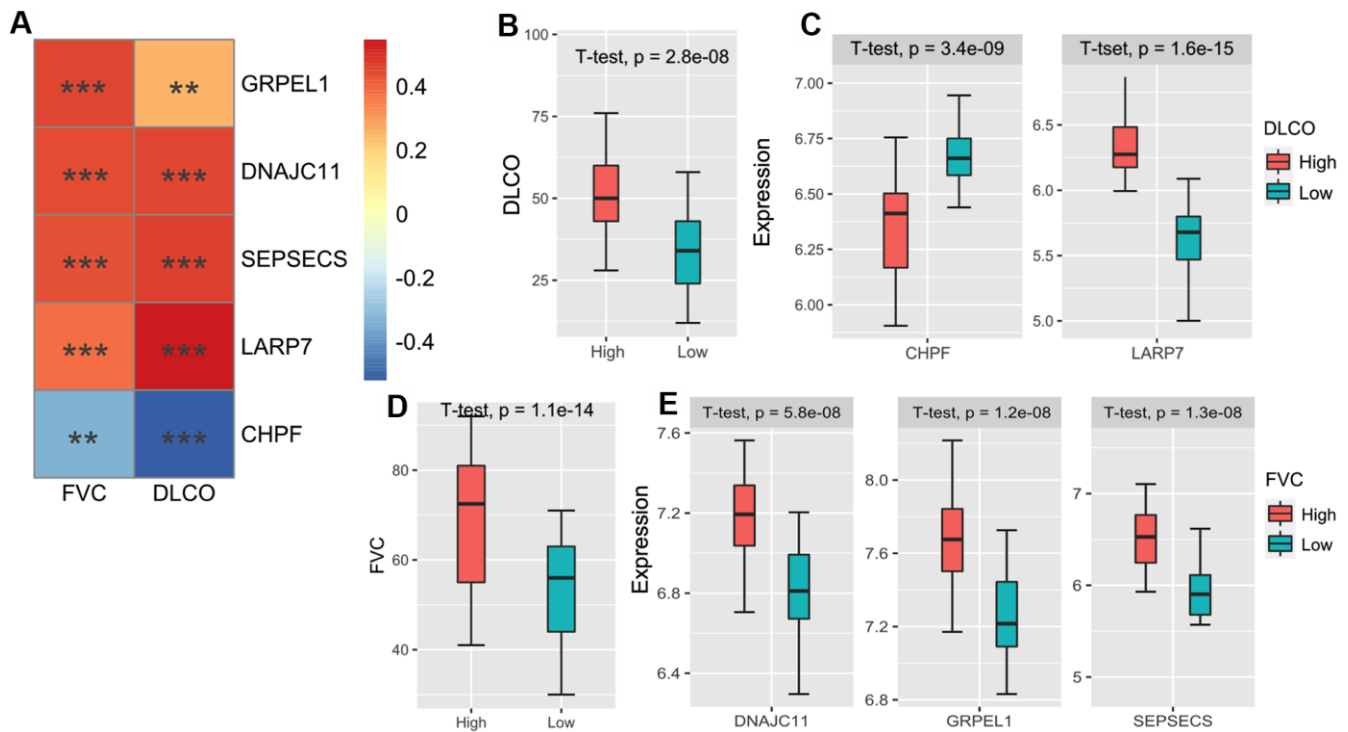

**Figure 6.** (A) The heatmap of the correlations between the 5 m<sup>6</sup>A-related-CoV genes and FVC/DLCO in the GSE38958 validation cohort. (B) The box plot shows the difference of the DLCO between high DLCO and low DLCO clusters. (C) The box plot shows the different expressions of LARP7 and CHPF between high DLCO and low DLCO clusters. (D) The box plot shows the difference of FVC between high FVC and low FVC clusters. (E) The box plot shows the different expressions of GRP EL1, DNAJC11, and SEPSECS between high FVC and low FVC clusters.

**Table 1. The network of m6A-SARS-Cov-2 related genes and immune infiltration patterns IPF patients' different organizations.**

| Series    | Cell type / Tissue                 | IPF patients | Score1 (m6A-related CoV genes)                      | Score2 (m6A-CoV related lncRNAs)   | Score3 (SARS-CoV-2 related immune infiltration)             | Clinical information for validation |
|-----------|------------------------------------|--------------|-----------------------------------------------------|------------------------------------|-------------------------------------------------------------|-------------------------------------|
| GSE70 867 | Bronchoalveolar lavage cells       | 176          | BRD4/REEP5/ATP13A3/REEP6/PPIL3/POR/MARK3/ACAD9      | MGC4859/HYMAI                      | NK cells/DC cells/Mast cells<br>NINL/SLC27A2/F2RL1/FBLN5    | Survival status and time            |
| GSE28 221 | Peripheral blood mononuclear cells | 120          | MOV10/HOOK1/BCKDK/DNAJC19/AKAP9/PABPC4/MAT2B        | SNHG1/SNHG12/MIAT/FLJ20021/C9orf62 | Naive CD4+ T cells<br>HOOK1                                 | Survival status and time            |
| GSE93 606 | Whole blood                        | 56           | ZC3H7A/YIF1A/BAG5/RHOA/NUP214/INTS4/GLA/AAR2/ATP1B1 | /                                  | $\gamma\delta$ T cells/M2 Macrophages<br>OS9/COLGALT1/HOOK1 | Survival status and time            |
| GSE38 958 | Peripheral blood mononuclear cells | 60           | GRPEL1/DNAJC11/SEPSECS/LARP7/CHPF                   | /                                  | /                                                           | FVC/DLCO                            |

and cytokine secretion in a bleomycin-induced systemic sclerosis mouse model [33]. Th9 cells, which produce IL-9, also play dual roles in pulmonary fibrosis. Overexpression of IL-9 *in vivo* leads to the accumulation of collagen and laminin in bronchial tubes, resulting in a pro-fibrotic effect [34]. M2 macrophages had recognized pro-fibrotic effects. The M2-type macrophage marker CCL18 was significantly increased in the serum and BAL of IPF patients, involved in the formation of fibrosis [35]; M2 macrophages can also produce TGF- $\beta$  and PDGF to continuously activate fibroblasts and promote myofibroblast proliferation [36]. The role of  $\gamma\delta$ T cells in pulmonary fibrosis remains controversial. A recent study showed that pulmonary inflammation and fibrosis were promoted by PM2.5-induced secretion of IL-17A, which inhibits autophagy in bronchial epithelial cells [37]. In contrast, a previous study also suggested that pulmonary  $\gamma\delta$ T cells seemed to play a regulatory role in suppressing fibrosis via the suppression of IL-17A production and IL-17A(+) CD4(+) T cells. The results of our study support this former viewpoint.

Therefore, high immune infiltration in the lung microenvironment is a risk factor for poor prognosis. At the same time, these immune cells may be widely associated with SARS-CoV-2 and fibrosis-related genes. The control of pulmonary inflammation has clinical significance in relieving the symptoms of IPF or COVID-19 patients.

In conclusion, we identified SARS-CoV-2 related genes associated with IPF prognosis and lung function and demonstrated that their expression was widely

regulated by m<sup>6</sup>A regulators. In addition, we found some characteristic co-expression networks of immune cells and SARS-CoV-2 related genes that were thought to mediate special immune response patterns in IPF. Our research is important for further understanding the genetic and cellular links between IPF and SARS-CoV-2 infection in the context of the COVID-19 pandemic. These associations could also be beneficial for the management of IPF and COVID-19.

## MATERIALS AND METHODS

The general ideas and methodologies used in this study are drawn as a flow chart (Figure 7).

### Patient cohort and data preparation

The discovery cohort of the study contained 176 IPF patients from the Gene Expression Omnibus (GEO, available at: <https://www.ncbi.nlm.nih.gov/geo/>) database (GSE70867), including 176 IPF patients' BAL cells. Three validation cohorts were used for the external validation (GSE93606, GSE28221, and GSE38958) to examine the predictive effect of the prediction method. The microarray data of GSE93606 included 57 patients with IPF and peripheral whole blood samples. The microarray data of GSE28221 included 120 peripheral blood mononuclear cells from patients with IPF. The microarray data of GSE38958 included 60 IPF patients' peripheral whole blood samples. All procedures in this study complied with the protocol. For analyses of data from a public database, approval and informed consent from the local ethics committee were not required.

## Identification of gene expression patterns related to m<sup>6</sup>A and SARS-CoV-2 in IPF

Human genes that may be relevant for SARS-CoV-2 infection were defined as SARS-CoV-2 related genes. Three hundred thirty-two SARS-CoV-2 related proteins were identified to be associated with 26 SARS-CoV-2 proteins in human cells [9], which can also be downloaded from “<http://geneontology.org/covid-19.html>.” Human genes related to m<sup>6</sup>A modification were defined as m<sup>6</sup>A-related genes, and 22 m<sup>6</sup>A-related genes were identified from the literature [38].

The expression matrices of available m<sup>6</sup>A-related and SARS-CoV-2 related genes were extracted. Pearson correlation analysis was performed to identify correlations between SARS-CoV-2 related genes and m<sup>6</sup>A-related genes. A SARS-CoV-2 related gene whose expression value was related to (with the  $|\text{Pearson } R| > 0.5$  and  $p < 0.05$ ) one or more of the m<sup>6</sup>A-related genes was defined as an m<sup>6</sup>A-related-CoV gene.

## Identification of m<sup>6</sup>A-CoV related lncRNAs in IPF

Based on the long non-coding RNA (lncRNA) annotation file of the Genome Reference Consortium

Human Build 38 (GRCh38) acquired from GENCODE (<https://www.genecodegenes.org/>), expression matrixes of lncRNAs were identified in the GEO dataset. lncRNAs that were significantly correlated (with the  $|\text{Pearson } R| > 0.5$ , and  $p < 0.05$ ) with both m<sup>6</sup>A-related genes and SARS-CoV-2-related genes were defined as m<sup>6</sup>A-CoV related lncRNAs.

## Identification of immune infiltration patterns in IPF

The ESTIMATE algorithm was applied to identify the degree of immune cell infiltration and to predict the immune status [39]. Furthermore, the CIBERSORT algorithm was utilized to assess the infiltration of 22 types of immune cells in IPF [40]. Only those samples with a CIBERSORT output of  $p < 0.05$  were deemed worthy of further analysis.

## Prognosis prediction model of IPF based on multiple factors

Potential prognostic factors (such as genes, lncRNAs, and cells) were screened using univariate Cox analysis, and factors with  $p < 0.01$  were retained. The least absolute shrinkage and selection operator (LASSO) was applied to select the optimal variables, which is a type

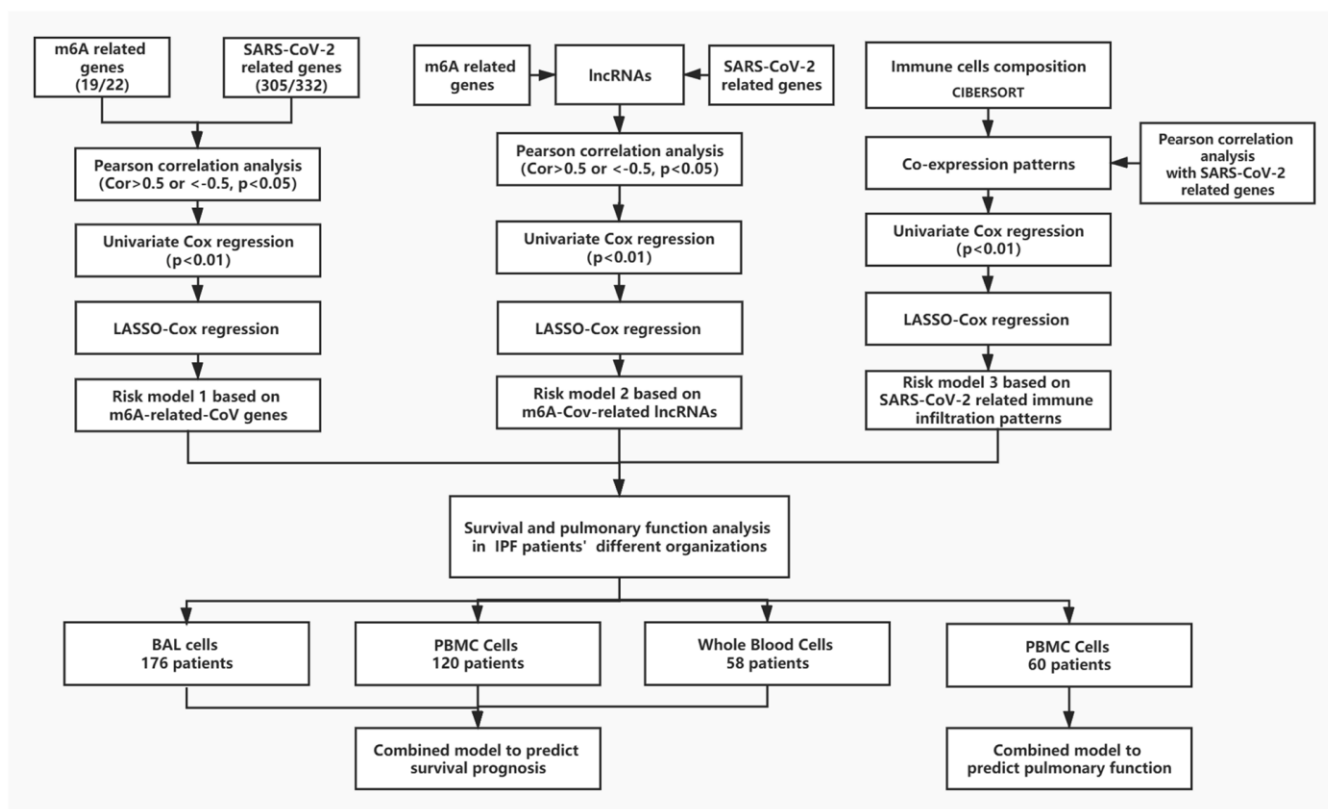

Figure 7. The flow chart of the general idea and methodologies used in this study.

of linear regression using shrinkage [41]. Then, we created a prognosis prediction model of IPF using the selected prognostic factors.

For each patient, the formula for calculating the risk score was as follows:  $\text{Score} = \sum_{i=1}^n \ln \text{Coef}_i * x_i$ , where  $\text{Coef}_i$  indicates that the coefficient is derived from the multivariate Cox regression, and  $x_i$  is the value of each factor. According to the risk scores, the optimal cutting point was identified using the maximally selected rank method, and a prognosis prediction model of IPF was developed.

The Kaplan–Meier method was employed to examine the survival curves and compare the differences in survival across different scoring subgroups. The ROC curve of the risk score model was constructed to evaluate the impact of different factors in patients with IPF.

### Analysis of differentially expressed genes and functional enrichment

The limma algorithm was used to identify differentially expressed genes (DEGs) between the two groups. Genes with an FDR adjusted p-value < 0.0001 and an absolute value of  $\log_2$  (fold change) > 1 were considered immune-related DEGs.

GO analysis was used to evaluate the degree of enrichment of DEGs in biological processes, cellular components, and molecular functions. Those with  $p < 0.05$  and count (the number of enriched genes)  $\geq 3$  were considered as the cutoff criterion. GSEA was used to determine the functional or pathway enrichment under the proportion of genes with a  $\log_2 \text{FC}$  greater than 1 (or lower than -1) within a given gene set.

### Statistical analysis

All analyses were performed with R version 4.0.2 (<https://www.r-project.org/>) and the corresponding packages.

### Data availability

Data analyzed in this manuscript is already publicly available from the following GEO (<https://www.ncbi.nlm.nih.gov/geo/>) accession numbers: GSE70867, GSE93606, GSE28221, and GSE38958.

### AUTHOR CONTRIBUTIONS

Study was conceived and designed by Q.Z. Statistical analyses were performed by X.L. and C.P. Software

package was prepared by Z.Z. and H.C. Manuscript was written by X.L. and C.P. X.L. and C.P. are joint first authors.

### CONFLICTS OF INTEREST

The authors declare that they have no conflicts of interest.

### FUNDING

This study was supported by grants of the National Natural Science Foundation of China (81700658) and the Hunan Provincial Natural Science Foundation-Outstanding Youth Foundation (2020JJ3058).

### REFERENCES

1. Raghu G, Chen SY, Yeh WS, Maroni B, Li Q, Lee YC, Collard HR. Idiopathic pulmonary fibrosis in US medicare beneficiaries aged 65 years and older: incidence, prevalence, and survival, 2001–11. *Lancet Respir Med*. 2014; 2:566–72. [https://doi.org/10.1016/S2213-2600\(14\)70101-8](https://doi.org/10.1016/S2213-2600(14)70101-8) PMID:[24875841](https://pubmed.ncbi.nlm.nih.gov/24875841/)
2. Zhao BS, Roundtree IA, He C. Post-transcriptional gene regulation by mRNA modifications. *Nat Rev Mol Cell Biol*. 2017; 18:31–42. <https://doi.org/10.1038/nrm.2016.132> PMID:[27808276](https://pubmed.ncbi.nlm.nih.gov/27808276/)
3. Batista PJ, Molinie B, Wang J, Qu K, Zhang J, Li L, Bouley DM, Lujan E, Haddad B, Daneshvar K, Carter AC, Flynn RA, Zhou C, et al. m(6)A RNA modification controls cell fate transition in mammalian embryonic stem cells. *Cell Stem Cell*. 2014; 15:707–19. <https://doi.org/10.1016/j.stem.2014.09.019> PMID:[25456834](https://pubmed.ncbi.nlm.nih.gov/25456834/)
4. Lu M, Zhang Z, Xue M, Zhao BS, Harder O, Li A, Liang X, Gao TZ, Xu Y, Zhou J, Feng Z, Niewiesk S, Peeples ME, et al. N<sup>6</sup>-methyladenosine modification enables viral RNA to escape recognition by RNA sensor RIG-I. *Nat Microbiol*. 2020; 5:584–98. <https://doi.org/10.1038/s41564-019-0653-9> PMID:[32015498](https://pubmed.ncbi.nlm.nih.gov/32015498/)
5. Wang H, Deng Q, Lv Z, Ling Y, Hou X, Chen Z, Dinglin X, Ma S, Li D, Wu Y, Peng Y, Huang H, Chen L. N<sup>6</sup>-methyladenosine induced miR-143-3p promotes the brain metastasis of lung cancer via regulation of VASH1. *Mol Cancer*. 2019; 18:181. <https://doi.org/10.1186/s12943-019-1108-x> PMID:[31823788](https://pubmed.ncbi.nlm.nih.gov/31823788/)
6. Tu Z, Wu L, Wang P, Hu Q, Tao C, Li K, Huang K, Zhu X. N<sup>6</sup>-methyladenosine-related lncRNAs are potential biomarkers for predicting the overall survival of lower-

- grade glioma patients. *Front Cell Dev Biol.* 2020; 8:642.  
<https://doi.org/10.3389/fcell.2020.00642>  
PMID:[32793593](https://pubmed.ncbi.nlm.nih.gov/32793593/)
7. Fan L, Lin Y, Lei H, Shu G, He L, Yan Z, Rihan H, Yin G. A newly defined risk signature, consisting of three m<sup>6</sup>A RNA methylation regulators, predicts the prognosis of ovarian cancer. *Aging (Albany NY).* 2020; 12:18453–75.  
<https://doi.org/10.18632/aging.103811>  
PMID:[32950970](https://pubmed.ncbi.nlm.nih.gov/32950970/)
8. Han B, Chu C, Su X, Zhang N, Zhou L, Zhang M, Yang S, Shi L, Zhao B, Niu Y, Zhang R. N<sup>6</sup>-methyladenosine-dependent primary microRNA-126 processing activated PI3K-AKT-mTOR pathway drove the development of pulmonary fibrosis induced by nanoscale carbon black particles in rats. *Nanotoxicology.* 2020; 14:1–20.  
<https://doi.org/10.1080/17435390.2019.1661041>  
PMID:[31502903](https://pubmed.ncbi.nlm.nih.gov/31502903/)
9. Gordon DE, Jang GM, Bouhaddou M, Xu J, Obernier K, White KM, O'Meara MJ, Rezelj VV, Guo JZ, Swaney DL, Tummino TA, Hüttenhain R, Kaake RM, et al. A SARS-CoV-2 protein interaction map reveals targets for drug repurposing. *Nature.* 2020; 583:459–68.  
<https://doi.org/10.1038/s41586-020-2286-9>  
PMID:[32353859](https://pubmed.ncbi.nlm.nih.gov/32353859/)
10. Zhang C, Wu Z, Li JW, Tan K, Yang W, Zhao H, Wang GQ. Discharge may not be the end of treatment: Pay attention to pulmonary fibrosis caused by severe COVID-19. *J Med Virol.* 2021; 93:1378–86.  
<https://doi.org/10.1002/jmv.26634> PMID:[33107641](https://pubmed.ncbi.nlm.nih.gov/33107641/)
11. George PM, Wells AU, Jenkins RG. Pulmonary fibrosis and COVID-19: the potential role for antifibrotic therapy. *Lancet Respir Med.* 2020; 8:807–15.  
[https://doi.org/10.1016/S2213-2600\(20\)30225-3](https://doi.org/10.1016/S2213-2600(20)30225-3)  
PMID:[32422178](https://pubmed.ncbi.nlm.nih.gov/32422178/)
12. Pehote G, Vij N. Autophagy augmentation to alleviate immune response dysfunction, and resolve respiratory and COVID-19 exacerbations. *Cells.* 2020; 9:1952.  
<https://doi.org/10.3390/cells9091952> PMID:[32847034](https://pubmed.ncbi.nlm.nih.gov/32847034/)
13. Maremanda KP, Sundar IK, Li D, Rahman I. Age-Dependent Assessment of Genes Involved in Cellular Senescence, Telomere, and Mitochondrial Pathways in Human Lung Tissue of Smokers, COPD, and IPF: Associations With SARS-CoV-2 COVID-19 ACE2-TMPRSS2-Furin-DPP4 Axis. *Front Pharmacol.* 2020; 11:58463.  
<https://doi.org/10.3389/fphar.2020.584637>  
PMID:[33013423](https://pubmed.ncbi.nlm.nih.gov/33013423/)
14. Taz TA, Ahmed K, Paul BK, Kawsar M, Aktar N, Mahmud SM, Moni MA. Network-based identification genetic effect of SARS-CoV-2 infections to idiopathic pulmonary fibrosis (IPF) patients. *Brief Bioinform.* 2020. [Epub ahead of print].  
<https://doi.org/10.1093/bib/bbaa235>  
PMID:[33024988](https://pubmed.ncbi.nlm.nih.gov/33024988/)
15. Li HB, Tong J, Zhu S, Batista PJ, Duffy EE, Zhao J, Bailis W, Cao G, Kroehling L, Chen Y, Wang G, Broughton JP, Chen YG, et al. m<sup>6</sup>A mRNA methylation controls T cell homeostasis by targeting the IL-7/STAT5/SOCS pathways. *Nature.* 2017; 548:338–42.  
<https://doi.org/10.1038/nature23450> PMID:[28792938](https://pubmed.ncbi.nlm.nih.gov/28792938/)
16. Zhang Y, Wang X, Zhang X, Wang J, Ma Y, Zhang L, Cao X. RNA-binding protein YTHDF3 suppresses interferon-dependent antiviral responses by promoting FOXO3 translation. *Proc Natl Acad Sci USA.* 2019; 116:976–81.  
<https://doi.org/10.1073/pnas.1812536116>  
PMID:[30591559](https://pubmed.ncbi.nlm.nih.gov/30591559/)
17. Liu Y, You Y, Lu Z, Yang J, Li P, Liu L, Xu H, Niu Y, Cao X. N<sup>6</sup>-methyladenosine RNA modification-mediated cellular metabolism rewiring inhibits viral replication. *Science.* 2019; 365:1171–76.  
<https://doi.org/10.1126/science.aax4468>  
PMID:[31439758](https://pubmed.ncbi.nlm.nih.gov/31439758/)
18. Belkina AC, Denis GV. BET domain co-regulators in obesity, inflammation and cancer. *Nat Rev Cancer.* 2012; 12:465–77.  
<https://doi.org/10.1038/nrc3256>  
PMID:[22722403](https://pubmed.ncbi.nlm.nih.gov/22722403/)
19. Tang X, Peng R, Ren Y, Apparsundaram S, Deguzman J, Bauer CM, Hoffman AF, Hamilton S, Liang Z, Zeng H, Fuentes ME, Demartino JA, Kitson C, et al. BET bromodomain proteins mediate downstream signaling events following growth factor stimulation in human lung fibroblasts and are involved in bleomycin-induced pulmonary fibrosis. *Mol Pharmacol.* 2013; 83:283–93.  
<https://doi.org/10.1124/mol.112.081661>  
PMID:[23115324](https://pubmed.ncbi.nlm.nih.gov/23115324/)
20. Stock CJ, Michaeloudes C, Leoni P, Durham AL, Mumby S, Wells AU, Chung KF, Adcock IM, Renzoni EA, Lindahl GE. Bromodomain and extraterminal (BET) protein inhibition restores redox balance and inhibits myofibroblast activation. *Biomed Res Int.* 2019; 2019:1484736.  
<https://doi.org/10.1155/2019/1484736>  
PMID:[31119153](https://pubmed.ncbi.nlm.nih.gov/31119153/)
21. Tian B, Zhao Y, Sun H, Zhang Y, Yang J, Brasier AR. BRD4 mediates NF-κB-dependent epithelial-mesenchymal transition and pulmonary fibrosis via transcriptional elongation. *Am J Physiol Lung Cell Mol Physiol.* 2016; 311:L1183–201.  
<https://doi.org/10.1152/ajplung.00224.2016>  
PMID:[27793799](https://pubmed.ncbi.nlm.nih.gov/27793799/)
22. Feng L, Yin YY, Liu CH, Xu KR, Li QR, Wu JR, Zeng R.

- Proteome-wide data analysis reveals tissue-specific network associated with SARS-CoV-2 infection. *J Mol Cell Biol*. 2020. [Epub ahead of print].  
<https://doi.org/10.1093/jmcb/mjaa033>  
 PMID:[32642770](https://pubmed.ncbi.nlm.nih.gov/32642770/)
23. Pertz O, Hodgson L, Klemke RL, Hahn KM. Spatiotemporal dynamics of RhoA activity in migrating cells. *Nature*. 2006; 440:1069–72.  
<https://doi.org/10.1038/nature04665>  
 PMID:[16547516](https://pubmed.ncbi.nlm.nih.gov/16547516/)
  24. Watts KL, Cottrell E, Hoban PR, Spiteri MA. RhoA signaling modulates cyclin D1 expression in human lung fibroblasts; implications for idiopathic pulmonary fibrosis. *Respir Res*. 2006; 7:88.  
<https://doi.org/10.1186/1465-9921-7-88>  
 PMID:[16776827](https://pubmed.ncbi.nlm.nih.gov/16776827/)
  25. Tian Z, Chen Y, Gao B. Natural killer cells in liver disease. *Hepatology*. 2013; 57:1654–62.  
<https://doi.org/10.1002/hep.26115> PMID:[23111952](https://pubmed.ncbi.nlm.nih.gov/23111952/)
  26. Monnier J, Zabel BA. Anti-asialo GM1 NK cell depleting antibody does not alter the development of bleomycin induced pulmonary fibrosis. *PLoS One*. 2014; 9:e99350.  
<https://doi.org/10.1371/journal.pone.0099350>  
 PMID:[24922516](https://pubmed.ncbi.nlm.nih.gov/24922516/)
  27. Cha SI, Chang CS, Kim EK, Lee JW, Matthay MA, Golden JA, Elicker BM, Jones K, Collard HR, Wolters PJ. Lung mast cell density defines a subpopulation of patients with idiopathic pulmonary fibrosis. *Histopathology*. 2012; 61:98–106.  
<https://doi.org/10.1111/j.1365-2559.2012.04197.x>  
 PMID:[22394225](https://pubmed.ncbi.nlm.nih.gov/22394225/)
  28. Lindstedt KA, Wang Y, Shiota N, Saarinen J, Hyytiäinen M, Kokkonen JO, Keski-Oja J, Kovanen PT. Activation of paracrine TGF-beta1 signaling upon stimulation and degranulation of rat serosal mast cells: a novel function for chymase. *FASEB J*. 2001; 15:1377–88.  
<https://doi.org/10.1096/fj.00-0273com>  
 PMID:[11387235](https://pubmed.ncbi.nlm.nih.gov/11387235/)
  29. Moiseeva EP, Roach KM, Leyland ML, Bradding P. CADM1 is a key receptor mediating human mast cell adhesion to human lung fibroblasts and airway smooth muscle cells. *PLoS One*. 2013; 8:e61579.  
<https://doi.org/10.1371/journal.pone.0061579>  
 PMID:[23620770](https://pubmed.ncbi.nlm.nih.gov/23620770/)
  30. Wygrecka M, Dahal BK, Kosanovic D, Petersen F, Taborski B, von Gerlach S, Didiasova M, Zakrzewicz D, Preissner KT, Schermuly RT, Markart P. Mast cells and fibroblasts work in concert to aggravate pulmonary fibrosis: role of transmembrane SCF and the PAR-2/PKC- $\alpha$ /Raf-1/p44/42 signaling pathway. *Am J Pathol*. 2013; 182:2094–108.  
<https://doi.org/10.1016/j.ajpath.2013.02.013>  
 PMID:[23562441](https://pubmed.ncbi.nlm.nih.gov/23562441/)
  31. Veerappan A, O'Connor NJ, Brazin J, Reid AC, Jung A, McGee D, Summers B, Branch-Elliman D, Stiles B, Worgall S, Kaner RJ, Silver RB. Mast cells: a pivotal role in pulmonary fibrosis. *DNA Cell Biol*. 2013; 32:206–18.  
<https://doi.org/10.1089/dna.2013.2005>  
 PMID:[23570576](https://pubmed.ncbi.nlm.nih.gov/23570576/)
  32. Zhang M, Zhang S. T cells in fibrosis and fibrotic diseases. *Front Immunol*. 2020; 11:1142.  
<https://doi.org/10.3389/fimmu.2020.01142>  
 PMID:[32676074](https://pubmed.ncbi.nlm.nih.gov/32676074/)
  33. Lei L, Zhao C, Qin F, He ZY, Wang X, Zhong XN. Th17 cells and IL-17 promote the skin and lung inflammation and fibrosis process in a bleomycin-induced murine model of systemic sclerosis. *Clin Exp Rheumatol*. 2016 (Suppl 100); 34:14–22.  
 PMID:[26750756](https://pubmed.ncbi.nlm.nih.gov/26750756/)
  34. van den Brûle S, Heymans J, Havaux X, Renaud JC, Lison D, Huaux F, Denis O. Profibrotic effect of IL-9 overexpression in a model of airway remodeling. *Am J Respir Cell Mol Biol*. 2007; 37:202–09.  
<https://doi.org/10.1165/rcmb.2006-0397OC>  
 PMID:[17446528](https://pubmed.ncbi.nlm.nih.gov/17446528/)
  35. Prasse A, Pechkovsky DV, Toews GB, Jungraithmayr W, Kollert F, Goldmann T, Vollmer E, Müller-Quernheim J, Zissel G. A vicious circle of alveolar macrophages and fibroblasts perpetuates pulmonary fibrosis via CCL18. *Am J Respir Crit Care Med*. 2006; 173:781–92.  
<https://doi.org/10.1164/rccm.200509-1518OC>  
 PMID:[16415274](https://pubmed.ncbi.nlm.nih.gov/16415274/)
  36. Zhang L, Wang Y, Wu G, Xiong W, Gu W, Wang CY. Macrophages: friend or foe in idiopathic pulmonary fibrosis? *Respir Res*. 2018; 19:170.  
<https://doi.org/10.1186/s12931-018-0864-2>  
 PMID:[30189872](https://pubmed.ncbi.nlm.nih.gov/30189872/)
  37. Cong LH, Li T, Wang H, Wu YN, Wang SP, Zhao YY, Zhang GQ, Duan J. IL-17A-producing T cells exacerbate fine particulate matter-induced lung inflammation and fibrosis by inhibiting PI3K/Akt/mTOR-mediated autophagy. *J Cell Mol Med*. 2020; 24:8532–44.  
<https://doi.org/10.1111/jcmm.15475> PMID:[32643865](https://pubmed.ncbi.nlm.nih.gov/32643865/)
  38. Liu L, Liu X, Dong Z, Li J, Yu Y, Chen X, Ren F, Cui G, Sun R. N6-methyladenosine-related genomic targets are altered in breast cancer tissue and associated with poor survival. *J Cancer*. 2019; 10:5447–59.  
<https://doi.org/10.7150/jca.35053> PMID:[31632489](https://pubmed.ncbi.nlm.nih.gov/31632489/)
  39. Yoshihara K, Shahmoradgoli M, Martínez E, Vegesna R, Kim H, Torres-Garcia W, Treviño V, Shen H, Laird PW, Levine DA, Carter SL, Getz G, Stemke-Hale K, et al. Inferring tumour purity and stromal and immune cell admixture from expression data. *Nat Commun*. 2013; 4:2612.

- <https://doi.org/10.1038/ncomms3612> PMID:[24113773](https://pubmed.ncbi.nlm.nih.gov/24113773/)
40. Newman AM, Liu CL, Green MR, Gentles AJ, Feng W, Xu Y, Hoang CD, Diehn M, Alizadeh AA. Robust enumeration of cell subsets from tissue expression profiles. *Nat Methods*. 2015; 12:453–57.  
<https://doi.org/10.1038/nmeth.3337> PMID:[25822800](https://pubmed.ncbi.nlm.nih.gov/25822800/)
41. Liu XY, Liang Y, Xu ZB, Zhang H, Leung KS. Adaptive  $L_{1/2}$  shooting regularization method for survival analysis using gene expression data. *ScientificWorldJournal*. 2013; 2013:475702.  
<https://doi.org/10.1155/2013/475702> PMID:[24453861](https://pubmed.ncbi.nlm.nih.gov/24453861/)
